# Supplementary material for: Tools for metal ion sorting: in vitro evidence for partitioning of zinc and cadmium in C. elegans metallothionein isoforms
Source: Royal Society of Chemistry journal article supplement (doi:10.1039/c0cc02188a), 2010-09-28
Supplement: c0cc02188a.pdf [file c0cc02188a.pdf]

# Tools for metal ion sorting: *In vitro* evidence for partitioning of zinc and cadmium in *C. elegans* metallothionein isoforms

Oksana I. Leszczyszyn<sup>a</sup>, Sukaina Zeitoun-Ghandour<sup>b</sup>, Stephen Stürzenbaum<sup>b</sup> and Claudia A.

Blindauer<sup>a</sup>

## Supplementary material

### Supplementary experimental details

*Expression and purification of C. elegans MT isoforms*

*<sup>19</sup>F NMR spectroscopy of ZnCd<sub>6</sub>-CeMT-1*

*Competition reaction monitored by mass spectrometry*

*Data analyses of the competition reaction*

*Incubation of Zn<sub>7</sub>-CeMT-1 with Cd<sup>2+</sup> excesses*

*Incubation of Cd<sub>7</sub>-CeMT-1 with Zn<sup>2+</sup> excesses*

*Calculation of expected Zn/Cd ratios based on affinity data*

- Figure S1:** ESI mass spectra following the uptake of Cd<sup>2+</sup> ions between *C. elegans* MT isoforms.
- Table S1:** Summary of isoform-specific metallospecies observed at different Cd:Zn ratios.
- Table S2:** Compilation of metallospecies observed by mass spectrometry
- Figure S2:** Figure S2: Deconvoluted ESI mass spectra showing CeMT-1 metallospecies present following incubation with excesses of Cd<sup>2+</sup> and Zn<sup>2+</sup>
- Table S3:** Summary of CeMT-bound Cd:Zn ratios
- Figure S3:** Sequence alignment of *C. elegans* MT isoforms

## Experimental details

### *Expression and purification of C. elegans MT isoforms*

The expression and purification of Zn-loaded CeMT-1 and -2 proteins was carried out using the protocol outlined by Zeitoun-Ghandour *et al.*<sup>1</sup> Accurate protein concentrations were determined through simultaneous detection of zinc and sulfur using inductively coupled plasma-optical emission spectroscopy (Perkin Elmer Optima 5300 DV ICP-OES). Concentrations of other metal ions were negligible.

### *<sup>19</sup>F NMR spectroscopy of Cd<sub>6</sub>Zn-CeMT-1*

To determine the affinity of the mixed metal species for Zn and Cd (Table 1), we employed 5F-BAPTA (1,2-bis(2-amino-5-fluoro-phenoxy)ethane-*N,N,N',N'*-tetraacetate) as competitive metal chelator and <sup>19</sup>F NMR spectroscopy using a method developed by Hasler *et al.*<sup>2</sup> An aliquot of purified Zn<sub>7</sub>-CeMT-1 in 0.2 M Tris-Cl (pH 7.4) was incubated at room temperature with 6.5 molar equivalents of CdCl<sub>2</sub> for 30 minutes. The protein solution was buffer exchanged by ultrafiltration into 10 mM Tris-Cl, pH 8.1, 10% D<sub>2</sub>O. This procedure also removed unbound metal ions from the solution. Elemental analysis and electrospray mass spectrometry (ESI-MS) confirmed Cd<sub>6</sub>Zn as the major metallospecies in solution. ICP-OES confirmed the Zn: Cd:protein stoichiometry to be 1.5:6.1:1 (error in analysis 10%). Conditions, technical parameters and data evaluation for both mass spectrometry and NMR spectroscopy are described in detail in reference 1. Uncertainties in the binding constants were calculated from the sum of the relative errors in NMR signals (10 times baseline noise) and the errors arising from the determination of concentrations by ICP-OES (estimated at 10% overall).

### *Competition reaction monitored by mass spectrometry*

A mixture of CeMT-1 and CeMT-2 proteins was prepared in 0.2 M Tris-Cl (pH 7.4) in a ratio of equivalent binding sites concentrations, 25 μM and 29 μM, respectively. Accurate concentrations of starting materials were determined by ICP-OES, which also confirmed the Zn:protein stoichiometry of CeMT-1 and CeMT-2 to be 7.3 ±0.7 and 6.1 ±0.6, respectively. The MT mixture was incubated with varying concentrations of CdCl<sub>2</sub> at room temperature for 30 minutes. Post incubation, the mixtures were extensively washed by ultrafiltration and buffer exchanged into 10 mM ammonium acetate buffer (pH 7.4). Methanol (10% v/v) was added to each sample immediately prior to mass spectral analysis.

Data were acquired in positive ion mode on a MicroTOF instrument (Bruker Daltonics, Coventry) using the following MS parameters: source temperature 195 °C; capillary exit 150 V; skimmer 1 50.0 V; skimmer 2 23.5 V; hexapole RF 550 V; hexapole 1 24.0 V; hexapole 2 20.9 V; transfer time 63.0  $\mu$ s. Samples were directly infused and spectra recorded for 1.5 minutes (flow rate: 4  $\mu$ L/min) over the  $m/z$  range of 500-3000 Th. Data processing and evaluation was carried out using the DataAnalysis™ software (Bruker Daltonics, Coventry). Each dataset was averaged, smoothed and baseline subtracted. Deconvolution of charge state envelopes was not possible due to manifestation of erroneous peaks in reconstructed spectra. Instead, related peaks were identified and subsequent analyses were carried out on the 5+ and 4+ charge states for CeMT-1 and CeMT-2, respectively.

#### *Data analyses of the competition reaction*

The following analyses were performed for each isoform separately at every titration point. Direct comparisons between the signal intensities of CeMT-1 and CeMT-2 are not required for this evaluation.

The total signal intensity for a given isoform was calculated by summing the MS intensities of all corresponding metallospecies. The abundance of each metallospecies was then expressed as a percentage of the total isoform signal intensity. These abundance values have been plotted as a function of the number of bound  $\text{Cd}^{2+}$  ions in Figure 2A. Using these abundance values and the Zn:Cd stoichiometry associated with each metallospecies derived from the observed mass, it is possible to calculate the overall proportion of  $\text{Zn}^{2+}$  and  $\text{Cd}^{2+}$  bound to both isoforms, at each titration point. For example, if only  $\text{Zn}_2\text{Cd}_5$ -CeMT-1 was observed, its abundance would be 100%. The proportion of  $\text{Zn}^{2+}$  bound to this isoform is calculated as a percentage:  $100\%/7*2 = 28.6\%$ , and that for bound  $\text{Cd}^{2+}$  as  $100\%/7*5 = 71.4\%$ . This gives the proportion of bound  $\text{Zn}^{2+}$  and  $\text{Cd}^{2+}$  to CeMT-1 as 28.6:71.4 % (see also Table S3). If more than one metallospecies is present, then the method is carried out for all species relating to one isoform and then individually summed for  $\text{Zn}^{2+}$  and  $\text{Cd}^{2+}$ . The results of such analyses have been plotted for the individual isoforms in Figure 2B.

#### *Incubation of $\text{Zn}_7$ -CeMT-1 with $\text{Cd}^{2+}$ excesses*

The  $\text{Zn}_7$ -CeMT-1 isoform was freshly prepared as outlined in *Expression and purification of C. elegans MT isoforms*. Aliquots of 25  $\mu$ M  $\text{Zn}_7$ -CeMT-1 in 0.2M Tris-Cl (pH 7.4) were incubated with (i) 0, (ii) 10 and (iii) 100 molar equivalents, with respect to protein concentration, with  $\text{Cd}^{2+}$ . Reactions were

allowed to proceed for 20 hours at room temperature. Desalting columns (Sephadex G25 PD10 columns, Amersham Biosciences) were used to remove excess metal and to buffer exchange the mixtures into 10 mM ammonium acetate (pH 7.6). The samples were concentrated by ultrafiltration. For ESI-MS analysis, methanol (10% v/v) was added to the sample prior to infusion. Data were acquired on a HCT-Ultra Ion Trap instrument (Bruker Daltonics, Coventry) in positive mode using the following parameters: Trap drive 151.9; Octopole RF Amplitude 210.4 V; Lens 2 -60V; Capillary Exit 211.0V; Dry Temperature 300°C; HV Capillary -4000V; HV End Plate Offset -500V. Samples were directly infused and spectra recorded for 1.5 minutes (flow rate: 4  $\mu\text{L}/\text{min}$ ) over the  $m/z$  range of 800-3000 Th. Data processing and evaluation was carried out using the DataAnalysis<sup>TM</sup> software (Bruker Daltonics, Coventry). Each dataset was averaged, smoothed and baseline subtracted. The charge state envelope was deconvoluted to give neutral masses.

#### *Incubation of Cd<sub>7</sub>-CeMT-1 with Zn<sup>2+</sup> excesses*

Cd<sub>7</sub>-CeMT-1 was prepared from Zn<sub>7</sub>-CeMT-1 using the protocol outlined in Zeitoun-Ghandour *et al.*<sup>1</sup> Briefly, apo-CeMT-1 was prepared by lowering the pH to 1 and removing metals by gel filtration at pH 1. Cd-loaded CeMT-1 was then reconstituted from this acidified, demetallated solution by adding a small excess of CdCl<sub>2</sub>, and bringing the pH back to ca. 7.4 with Tris base.

Aliquots of 25  $\mu\text{M}$  Cd<sub>7</sub>-CeMT-1 in 0.2M Tris-Cl (pH 7.4) were incubated with (i) 0, (ii) 1 and (iii) 10 molar equivalents, with respect to protein concentration, with Zn<sup>2+</sup>. These samples were subsequently treated using the same method as outlined above in preparation for mass spectrometry.

#### *Calculation of expected Zn/Cd ratios based on affinity data*

The average stability constants, as determined by competition with 5F-BAPTA for Zn<sub>7</sub>-CeMT-1, Zn<sub>6</sub>-CeMT-2, Cd<sub>7</sub>-CeMT-1, Cd<sub>6</sub>-CeMT-2, and Cd<sub>6</sub>Zn-CeMT-1 (Table 1), were used to calculate expected distributions of Zn<sup>2+</sup> and Cd<sup>2+</sup> between CeMT-1 and CeMT-2, using the "Species" subroutine of the IUPAC Stability Constants Database.<sup>3</sup> The calculations were based on the concentrations used in the mass spectrometric experiments, i.e. a total starting concentration of Zn<sup>2+</sup> of 0.35 mM, and 0.029 mM\*6 = 0.175 mM binding site concentration for CeMT-2. For CeMT-1, we used log  $K$  = 12.0 (for Zn) and 14.2 (for Cd) for six binding sites at a concentration of 0.15 mM (6\*0.025 mM), and log  $K$  = 11.6 (for Zn) or 8.6 (for Cd; the upper limit of our estimate) for one binding site (0.025 mM). Note that if the latter

log  $K$  value was changed to 6.4 for Cd (the lower value of our estimate of  $7.5 \pm 1.1$ ), the results were unchanged, because three orders of magnitude between the two constants already led to 100% occupation of the seventh site by  $\text{Zn}^{2+}$ . The  $\text{Cd}^{2+}$  concentrations used in the calculations were 0.076 mM, 0.153 mM, 0.264 mM, and 0.525 mM, giving Cd:Zn ratios of 0.22:1, 0.45:1, 0.75:1, and 1.5:1.

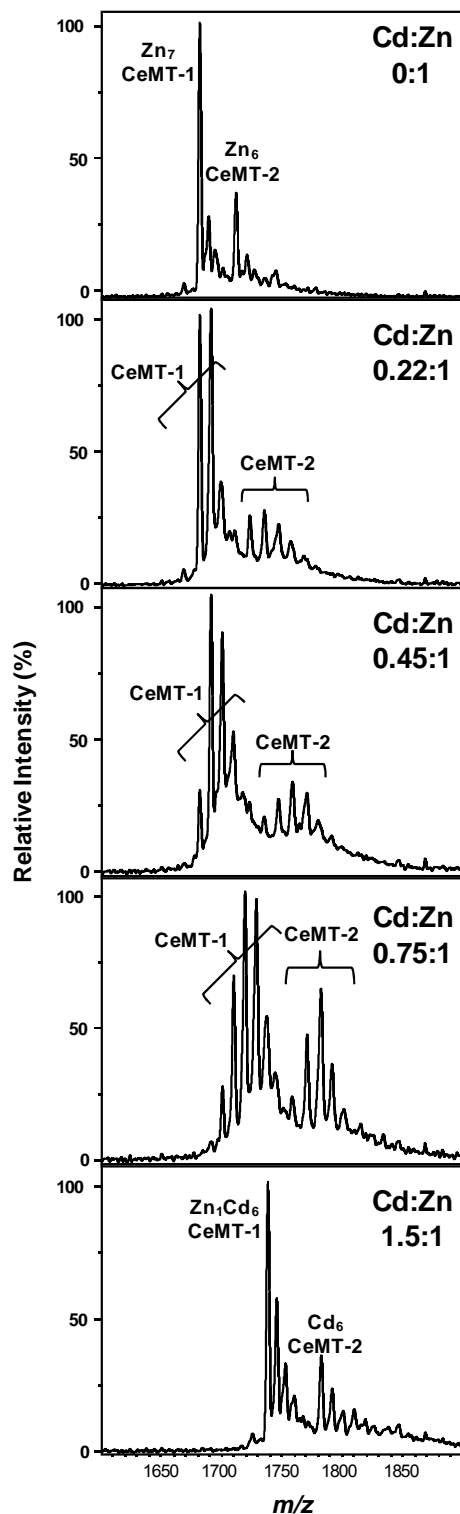

**Figure S1. ESI mass spectra following the uptake of  $\text{Cd}^{2+}$  ions between *C. elegans* MT isoforms. +5 (CeMT-1) and +4 (CeMT-2) charge state signals, showing various Zn/Cd metallospecies on titration with increasing quantities of  $\text{Cd}^{2+}$  ions. These charge states were selected for data evaluation since the best resolution of signals was observed in this  $m/z$  region; thus facilitating unambiguous analysis of individual mixed-metal species. The metallospecies present in each mass spectrum are summarised in Tables S1 and S2.**

**Table S1. Summary of isoform-specific metallospecies observed at different Cd:Zn ratios.** The most abundant species in the mass spectra are highlighted in bold.

| Cd:Zn  | Metalloforms observed                                                                                                                                         |                                                                                                                              |
|--------|---------------------------------------------------------------------------------------------------------------------------------------------------------------|------------------------------------------------------------------------------------------------------------------------------|
|        | CeMT-1                                                                                                                                                        | CeMT-2                                                                                                                       |
| 0:1    | Zn <sub>6</sub> ; <b>Zn<sub>7</sub></b>                                                                                                                       | <b>Zn<sub>6</sub></b>                                                                                                        |
| 0.22:1 | Zn <sub>6</sub> ; Zn <sub>7</sub> ; <b>CdZn<sub>6</sub></b>                                                                                                   | CdZn <sub>5</sub> ; <b>Cd<sub>2</sub>Zn<sub>4</sub></b> ; Cd <sub>3</sub> Zn <sub>3</sub>                                    |
| 0.45:1 | CdZn <sub>5</sub> ; Zn <sub>7</sub> ; <b>CdZn<sub>6</sub></b> ; Cd <sub>2</sub> Zn <sub>5</sub> ; Cd <sub>3</sub> Zn <sub>4</sub>                             | Cd <sub>2</sub> Zn <sub>4</sub> ; Cd <sub>3</sub> Zn <sub>3</sub> ; <b>Cd<sub>4</sub>Zn<sub>2</sub></b> ; Cd <sub>5</sub> Zn |
| 0.75:1 | CdZn <sub>6</sub> ; <b>Cd<sub>2</sub>Zn<sub>5</sub></b> ; Cd <sub>3</sub> Zn <sub>4</sub> ; Cd <sub>4</sub> Zn <sub>3</sub> ; Cd <sub>5</sub> Zn <sub>2</sub> | Cd <sub>4</sub> Zn <sub>2</sub> ; Cd <sub>5</sub> Zn; <b>Cd<sub>6</sub></b>                                                  |
| 1.5:1  | Cd <sub>6</sub> ; <b>Cd<sub>6</sub>Zn</b>                                                                                                                     | <b>Cd<sub>6</sub></b> ; Cd <sub>7</sub>                                                                                      |

**Table S2. Summary of speciation of metallopecies observed during titration.** The *m/z* values and corresponding original masses together with theoretical masses are provided. The original and theoretical masses are given in their neutral form. Masses marked with an asterisk denote signals taken from other charge states, whose intensities were used to correct those signals which could not be resolved. In all cases this correction had a negligible bearing on subsequent analysis.

| Cd:Zn   | MT     | Charge state | Obs. <i>m/z</i> (Th) | Original Mass (Da) | Theoretical Mass (Da) | Metallopecies                                                    |                   |
|---------|--------|--------------|----------------------|--------------------|-----------------------|------------------------------------------------------------------|-------------------|
| 0:1     | CeMT-1 | 5+           | 1668.2               | 8336.0             | 8339.2*               | Zn <sub>6</sub>                                                  |                   |
|         |        |              | 1681.4               | 8402.0             | 8402.6                | Zn <sub>7</sub>                                                  |                   |
|         |        |              | 1688.8               | 8439.0             | 8440.1                | Zn <sub>7</sub> +K <sup>+</sup>                                  |                   |
|         |        |              | 1693.8               | 8464.0             | 8462.1                | Zn <sub>7</sub> +K +Na <sup>+</sup>                              |                   |
|         |        |              | 1700.9               | 8499.5             | 8500.2                | Zn <sub>7</sub> +2K +Na <sup>+</sup>                             |                   |
|         |        |              | 1356.2*              | 6776.0             | 6779.7                | Zn <sub>5</sub>                                                  |                   |
|         | CeMT-2 | 4+           | 1711.4               | 6841.6             | 6843.1                | Zn <sub>6</sub>                                                  |                   |
|         |        |              | 1716.6               | 6862.4             | 6865.1                | Zn <sub>6</sub> +Na <sup>+</sup>                                 |                   |
|         |        |              | 1720.5               | 6878.0             | 6881.2                | Zn <sub>6</sub> +K <sup>+</sup>                                  |                   |
|         |        |              | 1726.6               | 6902.4             | 6903.2                | Zn <sub>6</sub> +K <sup>+</sup> +Na <sup>+</sup>                 |                   |
|         |        |              | 1744.3               | 6973.2             | 6974.3                | Zn <sub>6</sub> +Met                                             |                   |
|         |        |              | 1668.0               | 8335.0             | 8339.2*               | Zn <sub>6</sub>                                                  |                   |
|         | 0.22:1 | CeMT-1       | 5+                   | 1681.4             | 8402.0                | 8402.6                                                           | Zn <sub>7</sub>   |
|         |        |              |                      | 1690.7             | 8448.5                | 8449.7                                                           | CdZn <sub>6</sub> |
| 1698.8  |        |              |                      | 8489.0             | 8487.8                | CdZn <sub>6</sub> +K <sup>+</sup>                                |                   |
| 1706.0  |        |              |                      | 8525.0             | 8525.9                | CdZn <sub>6</sub> +2K <sup>+</sup>                               |                   |
| 1710.3  |        |              |                      | 8546.5             | 8547.9                | CdZn <sub>6</sub> +2K <sup>+</sup> +Na <sup>+</sup>              |                   |
| 1355.9* |        |              |                      | 6774.5             | 6779.7                | Zn <sub>5</sub>                                                  |                   |
| CeMT-2  |        | 4+           | 1369.1*              | 6840.5             | 6843.1                | Zn <sub>6</sub>                                                  |                   |
|         |        |              | 1722.9               | 6887.6             | 6890.1                | CdZn <sub>5</sub>                                                |                   |
|         |        |              | 1734.9               | 6935.6             | 6937.2                | Cd <sub>2</sub> Zn <sub>4</sub>                                  |                   |
|         |        |              | 1767.6               | 7066.4             | 7068.3                | Cd <sub>2</sub> Zn <sub>4</sub> +Met                             |                   |
|         |        |              | 1746.7               | 6982.8             | 6984.2                | Cd <sub>2</sub> Zn <sub>3</sub>                                  |                   |
|         |        |              | 1756.7               | 7022.8             | 7031.2                | Cd <sub>4</sub> Zn <sub>2</sub>                                  |                   |
|         |        |              | 1770.5               | 7078.0             | 7078.2                | Cd <sub>5</sub> Zn                                               |                   |
|         |        |              | 1677.1               | 8380.5             | 8386.3*               | CdZn <sub>5</sub>                                                |                   |
| 0.45:1  | MTL-1  | 5+           | 1681.3               | 8401.5             | 8402.6                | Zn <sub>7</sub>                                                  |                   |
|         |        |              | 1690.7               | 8448.5             | 8449.7                | CdZn <sub>6</sub>                                                |                   |
|         |        |              | 1700.0               | 8495.0             | 8496.7                | Cd <sub>2</sub> Zn <sub>5</sub>                                  |                   |
|         |        |              | 1709.2               | 8541.0             | 8543.7                | Cd <sub>3</sub> Zn <sub>4</sub>                                  |                   |
|         |        |              | 1716.8               | 8579.0             | 8581.8                | Cd <sub>3</sub> Zn <sub>4</sub> +K <sup>+</sup>                  |                   |
|         |        |              | 1722.4               | 8607.0             | 8603.9                | Cd <sub>3</sub> Zn <sub>4</sub> +K <sup>+</sup> +Na <sup>+</sup> |                   |
|         | MTL-2  | 4+           | 1365.4*              | 6822.0             | 6826.8                | Cd Zn <sub>4</sub>                                               |                   |
|         |        |              | 1734.8               | 6935.2             | 6937.2                | Cd <sub>2</sub> Zn <sub>4</sub>                                  |                   |
|         |        |              | 1746.5               | 6982.0             | 6984.2                | Cd <sub>3</sub> Zn <sub>3</sub>                                  |                   |
|         |        |              | 1779.4               | 7113.6             | 7115.7                | Cd <sub>3</sub> Zn <sub>3</sub> +Met                             |                   |
|         |        |              | 1758.2               | 7028.8             | 7031.2                | Cd <sub>4</sub> Zn <sub>2</sub>                                  |                   |
|         |        |              | 1791.0               | 7160.0             | 7162.4                | Cd <sub>4</sub> Zn <sub>2</sub> +Met                             |                   |
|         |        |              | 1770.1               | 7076.4             | 7078.2                | Cd <sub>5</sub> Zn                                               |                   |
|         |        |              | 1690.8               | 8449.0             | 8449.7                | CdZn <sub>6</sub>                                                |                   |
| 0.75:1  | MTL-1  | 5+           | 1700.1               | 8495.5             | 8496.7                | Cd <sub>2</sub> Zn <sub>5</sub>                                  |                   |
|         |        |              | 1709.5               | 8542.5             | 8543.7                | Cd <sub>3</sub> Zn <sub>4</sub>                                  |                   |
|         |        |              | 1718.9               | 8589.5             | 8590.8                | Cd <sub>4</sub> Zn <sub>3</sub>                                  |                   |
|         |        |              | 1728.2               | 8636.0             | 8637.8                | Cd <sub>5</sub> Zn <sub>2</sub>                                  |                   |
|         |        |              | 1736.8               | 8679.0             | 8675.9                | Cd <sub>5</sub> Zn <sub>2</sub> +K <sup>+</sup>                  |                   |
|         |        |              | 1743.7               | 8713.5             | 8714.0                | Cd <sub>5</sub> Zn <sub>2</sub> +2K <sup>+</sup>                 |                   |
|         | MTL-2  | 4+           | 1750.7               | 8748.5             | 8752.1                | Cd <sub>5</sub> Zn <sub>2</sub> +3K <sup>+</sup>                 |                   |
|         |        |              | 1384.0*              | 6915.0             | 6920.8                | Cd <sub>3</sub> Zn <sub>2</sub>                                  |                   |
|         |        |              | 1397.7*              | 6983.5             | 6984.2                | Cd <sub>3</sub> Zn <sub>3</sub>                                  |                   |
|         |        |              | 1757.9               | 7027.6             | 7031.2                | Cd <sub>4</sub> Zn <sub>2</sub>                                  |                   |
|         |        |              | 1770.3               | 7077.2             | 7078.2                | Cd <sub>5</sub> Zn                                               |                   |
|         |        |              | 1781.9               | 7123.6             | 7125.3                | Cd <sub>6</sub>                                                  |                   |
|         |        |              | 1791.0               | 7160.0             | 7163.4                | Cd <sub>6</sub> +K <sup>+</sup>                                  |                   |
|         |        |              | 1800.9               | 7199.6             | 7201.5                | Cd <sub>6</sub> +2K <sup>+</sup>                                 |                   |
| 1815.2  | 7256.8 | 7256.6       | Cd <sub>6</sub> +Met |                    |                       |                                                                  |                   |
| 1.5:1   | MTL-1  | 5+           | 1725.1               | 8620.5             | 8621.5                | Cd <sub>6</sub>                                                  |                   |
|         |        |              | 1737.9               | 8684.5             | 8684.9                | Cd <sub>6</sub> Zn                                               |                   |
|         |        |              | 1745.2               | 8721.0             | 8723.0                | Cd <sub>6</sub> Zn +K <sup>+</sup>                               |                   |
|         |        |              | 1752.4               | 8757.0             | 8761.1                | Cd <sub>6</sub> Zn +2K <sup>+</sup>                              |                   |
|         |        |              | 1759.8               | 8794.0             | 8799.2                | Cd <sub>6</sub> Zn +3K <sup>+</sup>                              |                   |
|         |        |              | 1767.1               | 8830.5             | 8837.3                | Cd <sub>6</sub> Zn +4K <sup>+</sup>                              |                   |
|         | MTL-2  | 4+           | 1782.1               | 7124.4             | 7125.3                | Cd <sub>6</sub>                                                  |                   |
|         |        |              | 1791.1               | 7160.4             | 7163.4                | Cd <sub>6</sub> +K <sup>+</sup>                                  |                   |
|         |        |              | 1800.3               | 7197.2             | 7201.5                | Cd <sub>6</sub> +2K <sup>+</sup>                                 |                   |
|         |        |              | 1815.0               | 7256.0             | 7256.6                | Cd <sub>6</sub> +Met                                             |                   |
|         |        |              | 1809.4               | 7233.6             | 7235.6                | Cd <sub>7</sub>                                                  |                   |
|         |        |              | 1818.8               | 7271.2             | 7273.7                | Cd <sub>7</sub> +K <sup>+</sup>                                  |                   |

\*These signals have a very low intensity in the mass spectra; hence, their masses are greatly influenced by background noise.



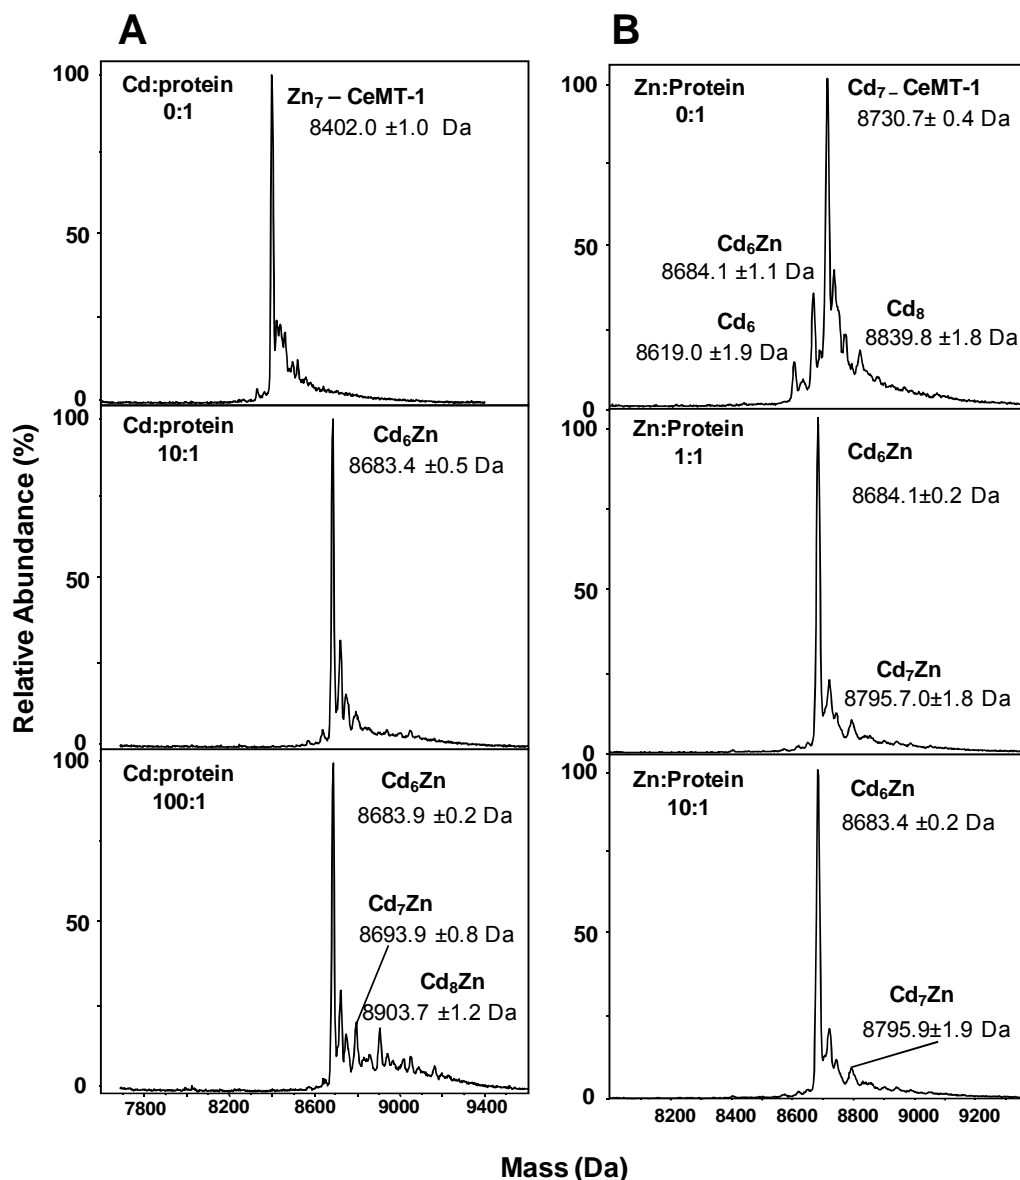

**Figure S2: Deconvoluted ESI mass spectra showing CeMT-1 metallospecies present following incubation with excesses of  $\text{Cd}^{2+}$  and  $\text{Zn}^{2+}$  after prolonged incubation times (20 h).** (A) Incubation of  $\text{Zn}_7$ -CeMT-1 with 0, 10 and 100 molar equivalents of  $\text{Cd}^{2+}$  (with respect to protein concentration). (B) Incubation of a preparation of  $\text{Cd}_7$ -CeMT-1 (generated by reconstitution of the apo-protein) with 0, 1 and 10 molar equivalents (with respect to protein concentration) of  $\text{Zn}^{2+}$ . For experimental conditions, the reader is referred to the experimental section above.

(A) The incubation of zinc-loaded MT-1 with 10 molar equivalents of  $\text{Cd}^{2+}$  with respect to protein concentration yields only one metallospecies, the mass of which corresponds to that of  $\text{Cd}_6\text{Zn}$ -CeMT-1 (Calculated mass: 8684.9 Da). Even at a 100-fold excess after 20 h, the  $\text{Cd}_6\text{Zn}$ -CeMT-1 metallospecies was still the most abundant, but minor species corresponding to  $\text{Cd}_7\text{Zn}$ - and  $\text{Cd}_8\text{Zn}$ -CeMT-1 were also observed. No signals of fully Cd-loaded  $\text{Cd}_7$ -CeMT-1 species were detectable.

(B) The mass spectrum of the  $\text{Cd}_7$ -CeMT-1 preparation shows that the  $\text{Cd}_7$  metallospecies (Calculated mass: 8731.9 Da) is the most abundant, but despite rigorous desalting before reconstitution, a residual signal corresponding to the  $\text{Cd}_6\text{Zn}$ -CeMT-1 metallospecies is still present. Over- and under-metallated  $\text{Cd}_6$  (8621.5 Da) and  $\text{Cd}_8$  (8842.3 Da) are also present simultaneously, indicating that these are not significantly less stable than the  $\text{Cd}_7$  species. Therefore, preparation of pure  $\text{Cd}_7$  metallospecies is not possible (also observed in ref 1). On incubation with 1 and 10 molar equivalents of  $\text{Zn}^{2+}$ , the  $\text{Cd}_6\text{Zn}$  metallospecies predominates, with a small trace of  $\text{Cd}_7\text{Zn}$  observed. These experiments indicate that  $\text{Cd}_6\text{Zn}$  is indeed a thermodynamic product, as it is formed quantitatively, even at an only 1:1 ratio of Zn to  $\text{Cd}_7$ -CeMT-1, from the  $\text{Cd}_7$  species. They also rule out that the seventh site is kinetically inert, and that slow metal exchange kinetics were the cause for the consistent predominance of this species in the presence of both  $\text{Zn}^{2+}$  and  $\text{Cd}^{2+}$  - *in vitro* and *in vivo*.

```

                                     *      *      * *
CeMT-1 (M)ACKCDCKNKQCKC--GDK-CECSGDKCCEKYCCEEASEKKCCPAGCKGDKCANCHCAEQKQCGDKTHQHQTAAAH
      | | | | | | | | | | | | | | | | | | | | | | | | | | | | | | | | | | | | | | | | | | |
CeMT-2 (M)VCKCDCKNQNCSCNTGTKDCDCSDAKCCEQYCCPTASEKKCCKSGCAGGCKCANCECAQ-----AAH

```

**Figure S3. Sequence alignment of *C. elegans* MT isoforms.** Residues highlighted with asterisks correspond to additional ligands in the CeMT-1 isoform thought to participate in metal ion coordination.

**Table S3. Summary of CeMT-bound Cd:Zn ratios** based on metallospecies observed by ESI-MS (Fig. 2B; Obs.) and calculated using conditional average stability constants (from Table 1; Calc.).<sup>†</sup>

| Cd:Zn:        | % Cd:Zn in individual MT isoform |             |             |             |             |             |             |             |
|---------------|----------------------------------|-------------|-------------|-------------|-------------|-------------|-------------|-------------|
|               | 0.22:1                           |             | 0.45:1      |             | 0.75:1      |             | 1.5:1       |             |
|               | Obs.                             | Calc.       | Obs.        | Calc.       | Obs.        | Calc.       | Obs.        | Calc.       |
| <b>CeMT-1</b> | 8.5 : 91.5                       | 7.1 : 92.9  | 26.4 : 73.6 | 20.6 : 79.4 | 52.0 : 42.0 | 56.6 : 43.4 | 85.7 : 14.3 | 84.9 : 15.1 |
| <b>CeMT-2</b> | 35.3 : 64.7                      | 36.3 : 63.7 | 61.2 : 38.8 | 66.6 : 33.4 | 92.8 : 7.2  | 92.5 : 7.5  | 100.0 : 0.0 | 99.8 : 0.2  |

- 
1. S. Zeitoun-Ghandour, J. M. Charnock, M. E. Hodson, O. I. Leszczyszyn, C. A. Blindauer and S. R. Stürzenbaum, , *FEBS J.*, 2010, **277**, 2531-2542.
  2. D. W. Hasler, L. T. Jensen, O. Zerbe, D. R. Winge and M. Vašák, , *Biochemistry*, 2000, 39, 14567-14575.
  3. IUPAC Stability Constants Database, Data version 5.5 (compiled by L. D. Pettit and H. K. J. Powell), Academic Software, Timble, Otley, UK, 2005.
